# Supplementary material for: The association between atrial fibrillation and in-hospital outcomes in chronic kidney disease patients with acute coronary syndrome: findings from the improving care for cardiovascular disease in China-acute coronary syndrome (CCC-ACS) project
Source: Springer Nature journal article supplement (doi:10.1186/s12872-021-02125-z), 2021-07-17
Supplement: MOESM1 [file 19369708]

Table S1. Treatments pre-hospital and during hospitalization.

|                               | AF<br>(n=1418) | Non-AF<br>(n=15115) | <i>P</i> value |
|-------------------------------|----------------|---------------------|----------------|
| <b>Pre-hospital Treatment</b> |                |                     |                |
| Aspirin (n, %)                | 363(25.6)      | 3693(24.4)          | 0.329          |
| Clopidogrel (n, %)            | 212(15.0)      | 2423(16.0)          | 0.288          |
| Ticagrelor (n, %)             | 12(0.8)        | 201(1.3)            | 0.123          |
| Warfarin (n, %)               | 45(3.2)        | 33(0.2)             | <0.001         |
| Statins (n, %)                | 296(20.9)      | 3006(19.9)          | 0.374          |
| Beta-blockers (n, %)          | 181(12.8)      | 1645(10.9)          | 0.030          |
| ACEI/ARB (n, %)               | 226(15.9)      | 1989(13.2)          | 0.003          |
| <b>During hospitalization</b> |                |                     |                |
| PCI (n, %)                    | 580(40.9)      | 8454(55.9)          | <0.001         |

AF, atrial fibrillation; ACEI, angiotensin-converting enzyme inhibitor; ARB, angiotensin receptor blockade; PCI, percutaneous coronary intervention.



Table S2. Investigators of CCC-ACS project.

| <b>ID</b> | <b>Hospitals</b>                                                                          | <b>Territories</b> | <b>Provinces</b> | <b>City</b> | <b>Investigator</b>   |
|-----------|-------------------------------------------------------------------------------------------|--------------------|------------------|-------------|-----------------------|
| 1         | Shanxi Cardiovascular Hospital                                                            | Northern China     | Shanxi           | Taiyuan     | Bao Li                |
| 2         | Nanjing Drum Tower Hospital, The Affiliated Hospital of Nanjing University Medical School | Eastern China      | Jiangsu          | Nanjing     | Biao Xu, Guangshu Han |
| 3         | Hainan General Hospital                                                                   | Southern China     | Hainan           | Haikou      | Bin Li                |
| 4         | The Second Hospital of Jilin University                                                   | Northeast China    | Jilin            | Changchun   | Bin Liu               |
| 5         | The 2nd Affiliated Hospital of Harbin Medical University                                  | Northeast China    | Heilongjiang     | Harbin      | Bo Yu                 |
| 6         | The Ninth Hospital Affiliated to Shanghai Jiaotong University School of Medicine          | Eastern China      | Shanghai         | Shanghai    | Changqian Wang        |
| 7         | Henan Provincial People's Hospital                                                        | Central China      | Henan            | Zhengzhou   | Chuanyu Gao           |
| 8         | Shanxi Provincial People's Hospital                                                       | Northern China     | Shanxi           | Taiyuan     | Chunlin Lai           |
| 9         | Xinqiao Hospital, Third Military Medical University                                       | Southwest China    | Chongqing        | Chongqing   | Cui Bin, Lan Huang    |
| 10        | China Meitan General Hospital                                                             | Northern China     | Beijing          | Beijing     | Di Wu                 |

|    |                                                                     |                 |           |           |                       |
|----|---------------------------------------------------------------------|-----------------|-----------|-----------|-----------------------|
| 11 | The 309th Hospital of Chinese People's Liberation Army              | Northern China  | Beijing   | Beijing   | Fakuan Tang, Jun Xiao |
| 12 | Zhongda Hospital, Southeast University                              | Eastern China   | Jiangsu   | Nanjing   | Genshan Ma            |
| 13 | The First Affiliated Hospital of Liaoning Medical University        | Northeast China | Liaoning  | Jinzhou   | Guizhou Tao           |
| 14 | Xinjiang Uygur Autonomous Region People's Hospital                  | Northwest China | Xinjiang  | Urumchi   | Guoqing Li            |
| 15 | Sir Run Run Shaw Hospital, College of Medicine, Zhejiang University | Eastern China   | Zhejiang  | Hangzhou  | Guosheng Fu           |
| 16 | Beijing Friendship Hospital, Capital Medical University             | Northern China  | Beijing   | Beijing   | Hongwei Li            |
| 17 | The First Affiliated Hospital of Bengbu Medical College             | Eastern China   | Anhui     | Bengbu    | Honhju Wang           |
| 18 | General Hospital of TISCO                                           | Northern China  | Shanxi    | Taiyuan   | Huifeng Wang          |
| 19 | Dongguan People's Hospital                                          | Southern China  | Guangdong | Dongguan  | Jianfeng Ye           |
| 20 | Panyu Hospital of Chinese Medicine                                  | Southern China  | Guangdong | Guangzhou | Jianhao Li            |
| 21 | Peking University First Hospital                                    | Northern China  | Beijing   | Beijing   | Jie Jiang             |
| 22 | Sun Yat-sen Memorial Hospital, Sun Yat-sen University               | Southern China  | Guangdong | Guangzhou | Jingfeng Wang         |
| 23 | Guangdong General Hospital                                          | Southern China  | Guangdong | Guangzhou | Jiyan Chen            |
| 24 | Hospital of Xinjiang Production & Construction Corps                | Northwest China | Xinjiang  | Urumchi   | Junming Liu           |

|    |                                                                                |                 |          |           |                |
|----|--------------------------------------------------------------------------------|-----------------|----------|-----------|----------------|
| 25 | The Military General Hospital of Beijing PLA                                   | Northern China  | Beijing  | Beijing   | Junxia Li      |
| 26 | The First Affiliated Hospital of Guangxi Medical University                    | Southern China  | Guangxi  | Nanning   | Lang Li        |
| 27 | Tongren Hospital Affiliated to Shanghai Jiaotong University School of Medicine | Eastern China   | Shanghai | Shanghai  | Li Jiang       |
| 28 | Binzhou City Center Hospital                                                   | Eastern China   | Shandong | Binzhou   | Lijun Meng     |
| 29 | The First Affiliated Hospital of Zhengzhou University                          | Central China   | Henan    | Zhengzhou | Ling Li        |
| 30 | Xijing Hospital                                                                | Northwest China | Shaanxi  | Xi'an     | Ling Tao       |
| 31 | The Affiliated Hospital of Guizhou Medical University                          | Southwest China | Guizhou  | Guiyang   | Lirong Wu      |
| 32 | First Affiliated Hospital of the People's Liberation Army General Hospital     | Northern China  | Beijing  | Beijing   | Miao Tian      |
| 33 | The Second People's Hospital of Yunnan Province                                | Southwest China | Yunnan   | Kunming   | Minghua Han    |
| 34 | Haikou People's Hospital                                                       | Southern China  | Hainan   | Haikou    | Moshui Chen    |
| 35 | Gansu Provincial Hospital                                                      | Northwest China | Gansu    | Lanzhou   | Ping Xie       |
| 36 | The First Affiliated Hospital of Henan University of Science and Technology    | Central China   | Henan    | Luoyang   | Pingshuan Dong |

|    |                                                               |                 |           |           |                              |
|----|---------------------------------------------------------------|-----------------|-----------|-----------|------------------------------|
| 37 | Chenzhou First People's Hospital                              | Central China   | Hunan     | Chenzhou  | Qiaoqing Zhong               |
| 38 | People's Hospital of Qinghai Province                         | Northwest China | Qinghai   | Xining    | Rong Chang                   |
| 39 | Affiliated Hospital of Ningxia Medical University             | Northwest China | Ningxia   | Yinchuan  | Shaobin Jia                  |
| 40 | Beijing Anzhen Hospital, Capital Medical University           | Northern China  | Beijing   | Beijing   | Shaoping Nie, Xiaohui<br>Liu |
| 41 | North Jiangsu People's Hospital                               | Eastern China   | Jiangsu   | Yangzhou  | Shenghu He                   |
| 42 | Shanghai Sixth People's Hospital                              | Eastern China   | Shanghai  | Shanghai  | Shixin Ma                    |
| 43 | The First Hospital of Handan                                  | Northern China  | Hebei     | Handan    | Shuanli Xin                  |
| 44 | Huai'an First People's Hospital                               | Eastern China   | Jiangsu   | Huai'an   | Shuren Ma                    |
| 45 | The First Affiliated Hospital of Chongqing Medical University | Southwest China | Chongqing | Chongqing | Suxin Luo                    |
| 46 | Navy General Hospital                                         | Northern China  | Beijing   | Beijing   | Tianchang Li                 |
| 47 | Zhejiang Provincial Hospital of TCM                           | Eastern China   | Zhejiang  | Hangzhou  | Wei Mao                      |
| 48 | The Third Xiangya Hospital of Central South University        | Central China   | Hunan     | Changsha  | Weihong Jiang                |
| 49 | Affiliated Hospital of Qinghai University                     | Northwest China | Qinghai   | Xining    | Weijun Liu                   |

|    |                                                            |                 |                |              |                |
|----|------------------------------------------------------------|-----------------|----------------|--------------|----------------|
| 50 | Teda International Cardiovascular Hospital                 | Northern China  | Tianjin        | Tianjin      | Wenhua Lin     |
| 51 | The Second Hospital of Hebei Medical University            | Northern China  | Hebei          | Shijiazhuang | Xianghua Fu    |
| 52 | Changhai Hospital of Shanghai                              | Eastern China   | Shanghai       | Shanghai     | Xianxian Zhao  |
| 53 | The Second Affiliated Hospital to Nanchang University      | Eastern China   | Jiangxi        | Nanchang     | Xiaoshu Cheng  |
| 54 | Hebei General Hospital                                     | Northern China  | Hebei          | Shijiazhuang | Xiaoyong Qi    |
| 55 | Inner Mongolia People's Hospital                           | Northern China  | Inner Mongolia | Hohhot       | Xingsheng Zhao |
| 56 | The General Hospital of Shenyang Military Region           | Northeast China | Liaoning       | Shenyang     | Yaling Han     |
| 57 | The First Hospital of Jilin University                     | Northeast China | Jilin          | Changchun    | Yang Zheng     |
| 58 | Tianjin Chest Hospital                                     | Northern China  | Tianjin        | Tianjin      | Yin Liu        |
| 59 | Hunan Provincial People's Hospital                         | Central China   | Hunan          | Changsha     | Ying Guo       |
| 60 | People's Hospital of Yuxi City                             | Southwest China | Yunnan         | Yuxi         | Yinglu Hao     |
| 61 | The People's Hospital of Guangxi Zhuang Autonomous Region  | Southern China  | Guangxi        | Nanning      | Yingzhong Lin  |
| 62 | The First Teaching Hospital of Xinjiang Medical University | Northwest China | Xinjiang       | Urumchi      | Yitong Ma      |
| 63 | Baogang Hospital                                           | Northern China  | Inner Mongolia | Baotou       | Yongdong Li    |

|    |                                                            |                 |           |              |              |
|----|------------------------------------------------------------|-----------------|-----------|--------------|--------------|
| 64 | Tianjin Medical University General Hospital                | Northern China  | Tianjin   | Tianjin      | Yuemin Sun   |
| 65 | The Second Affiliated Hospital of Zhengzhou University     | Central China   | Henan     | Zhengzhou    | Yulan Zhao   |
| 66 | Nanfang Hospital of Southern Medical University            | Southern China  | Guangdong | Guangzhou    | Yuqing Hou   |
| 67 | The First Affiliated Hospital to Nanchang University       | Eastern China   | Jiangxi   | Nanchang     | Zeqi Zheng   |
| 68 | The First Affiliated Hospital of Lanzhou University        | Northwest China | Gansu     | Lanzhou      | Zheng Zhang  |
| 69 | The Third Hospital of Shijiazhuang                         | Northern China  | Hebei     | Shijiazhuang | Zhenguo Ji   |
| 70 | Wuxi People's Hospital                                     | Eastern China   | Jiangsu   | Wuxi         | Zhenyu Yang  |
| 71 | Jiangsu Province Hospital                                  | Eastern China   | Jiangsu   | Nanjing      | Zhijian Yang |
| 72 | The Second Hospital of Shanxi Medical University           | Northern China  | Shanxi    | Taiyuan      | Zhiming Yang |
| 73 | The Affiliated Hospital of Xuzhou Medical College          | Eastern China   | Jiangsu   | Xuzhou       | Zhirong Wang |
| 74 | Southwest Hospital, Third Military Medical University      | Southwest China | Chongqing | Chongqing    | Zhiyuan Song |
| 75 | The First Affiliated Hospital of Xi'an Jiaotong University | Northwest China | Shaanxi   | Xi'an        | Zuyi Yuan    |
| 76 | Yangzhou First People's Hospital                           | Eastern China   | Jiangsu   | Yangzhou     | Aihua Li     |
| 77 | Hospital 463 of Chinese People's Liberation Army           | Northeast China | Liaoning  | Shenyang     | Bosong Yang  |



|    |                                                                  |                 |              |           |                |
|----|------------------------------------------------------------------|-----------------|--------------|-----------|----------------|
| 78 | The Central Hospital of Mianyang                                 | Northwest China | Sichuan      | Mianyang  | Caidong Luo    |
| 79 | Liaocheng People's Hospital                                      | Eastern China   | Shandong     | Liaocheng | Chunyan Zhang  |
| 80 | Yancheng Third People's Hospital                                 | Eastern China   | Jiangsu      | Yancheng  | Chunyang Wu    |
| 81 | The Second Xiangya Hospital of Central South University          | Central China   | Hunan        | Changsha  | Daoquan Peng   |
| 82 | The Central Hospital of Panzhihua                                | Northwest China | Sichuan      | Panzhihua | Dawen Xu       |
| 83 | The First Hospital of Qiqihar City                               | Northeast China | Heilongjiang | Qiqihar   | Gang Xu        |
| 84 | The Third the People's Hospital of Bengbu                        | Eastern China   | Anhui        | Bengbu    | Gengsheng Sang |
| 85 | The First Hospital of Jiamusi                                    | Northeast China | Heilongjiang | Jiamusi   | Guixia Zhang   |
| 86 | Zhoushan People's Hospital                                       | Eastern China   | Zhejiang     | Zhoushan  | Guoxiong Chen  |
| 87 | Dalian Municipal Central Hospital                                | Northeast China | Liaoning     | Dalian    | Hailong Lin    |
| 88 | Renmin Hospital of Wuhan University                              | Central China   | Hubei        | Wuhan     | Hong Jiang     |
| 89 | Ningxia People's Hospital                                        | Northwest China | Ningxia      | Yinchuan  | Hong Luan      |
| 90 | The First People's Hospital of Yunnan Province (Kunhua Hospital) | Southwest China | Yunnan       | Kunming   | Hong Zhang     |
| 91 | The Central Hospital of Zhoukou                                  | Central China   | Henan        | Zhoukou   | Hualing Liu    |

|     |                                                            |                 |              |            |              |
|-----|------------------------------------------------------------|-----------------|--------------|------------|--------------|
| 92  | Anyang District Hospital                                   | Central China   | Henan        | Anyang     | Hui Liu      |
| 93  | Sichuan Provincial People's Hospital                       | Northwest China | Sichuan      | Chengdu    | Jianhong Tao |
| 94  | Mudanjiang Cardiovascular Disease Hospital                 | Northeast China | Heilongjiang | Mudanjiang | Jianwen Liu  |
| 95  | Yichang Central Hospital                                   | Central China   | Hubei        | Yichang    | Jiawang Ding |
| 96  | Qilu Hospital of Shandong University                       | Eastern China   | Shandong     | Jinan      | Jifu Li      |
| 97  | Affiliated Hospital of Jiangsu University                  | Eastern China   | Jiangsu      | Zhenjiang  | Jinchuan Yan |
| 98  | The First People's Hospital of Nanning City                | Southern China  | Guangxi      | Nanning    | Jinru Wei    |
| 99  | The First Affiliated Hospital of Fujian Medical University | Eastern China   | Fujian       | Fuzhou     | Jinzi Su     |
| 100 | Chengdu Third People's Hospital                            | Northwest China | Sichuan      | Chengdu    | Jiong Tang   |
| 101 | Yantaishan hospital                                        | Eastern China   | Shandong     | Yantai     | Juexin Fan   |
| 102 | Qingdao Municipal Hospital                                 | Eastern China   | Shandong     | Qingdao    | Jun Guan     |
| 103 | Zhongshan Hospital Affiliated to Fudan University          | Eastern China   | Shanghai     | Shanghai   | Junbo Ge     |
| 104 | Longyan First Hospital                                     | Eastern China   | Fujian       | Longyan    | Kaihong Chen |
| 105 | Affiliated Hospital of Guangdong Medical College           | Southern China  | Guangdong    | Guangzhou  | Keng Wu      |

|     |                                                                                      |                 |              |          |                            |
|-----|--------------------------------------------------------------------------------------|-----------------|--------------|----------|----------------------------|
| 106 | Jiangxi Provincial People's Hospital                                                 | Eastern China   | Jiangxi      | Nanchang | Lang Ji                    |
| 107 | Anhui Provincial Hospital                                                            | Eastern China   | Anhui        | Hefei    | Likun Ma                   |
| 108 | Xiangtan City Central Hospital                                                       | Central China   | Hunan        | Xiangtan | Lilong Tang                |
| 109 | The First Hospital of Haerbin City                                                   | Northeast China | Heilongjiang | Harbin   | Lin Wei                    |
| 110 | Central Hospital Affiliated to Shenyang Medical College                              | Northeast China | Liaoning     | Shenyang | Man Zhang, Kaiming<br>Chen |
| 111 | The Central Hospital of Wuhan                                                        | Central China   | Hubei        | Wuhan    | Manhua Chen                |
| 112 | Hangzhou First People's Hospital                                                     | Eastern China   | Zhejiang     | Hangzhou | Ningfu Wang                |
| 113 | The Central Hospital of Xuzhou                                                       | Eastern China   | Jiangsu      | Xuzhou   | Peiyang Zhang              |
| 114 | The Second hospital of Dalian Medical University                                     | Northeast China | Liaoning     | Dalian   | Peng Qu                    |
| 115 | The First Affiliated Hospital of Liaoning University of Traditional Chinese Medicine | Northeast China | Liaoning     | Shenyang | Ping Hou                   |
| 116 | Beijing Tsinghua Changgung Hospital                                                  | Northern China  | Beijing      | Beijing  | Ping Zhang                 |
| 117 | Guizhou Provincial People's Hospital                                                 | Southwest China | Guizhou      | Guiyang  | Qiang Wu                   |

|     |                                                             |                 |           |           |               |
|-----|-------------------------------------------------------------|-----------------|-----------|-----------|---------------|
| 118 | The First Affiliated Hospital of Xiamen University          | Eastern China   | Fujian    | Xiamen    | Qiang Xie     |
| 119 | Quanzhou First Hospital                                     | Eastern China   | Fujian    | Quanzhou  | Rong Lin      |
| 120 | Wuzhou People's Hospital                                    | Southern China  | Guangxi   | Wuzhou    | Shaowu Ye     |
| 121 | The Central Hospital of Jilin                               | Northeast China | Jilin     | Changchun | Shuangbin Li  |
| 122 | Xiangya Hospital Central South University                   | Central China   | Hunan     | Changsha  | Tianlun Yang  |
| 123 | Guangzhou Red Cross Hospital                                | Southern China  | Guangdong | Guangzhou | Tongguo Wu    |
| 124 | The First Affiliated Hospital of Guangzhou Medical College  | Southern China  | Guangdong | Guangzhou | Wei Wang      |
| 125 | The First Affiliated Hospital of Wenzhou Medical University | Eastern China   | Zhejiang  | Wenzhou   | Weijian Huang |
| 126 | The Second Affiliated Hospital of Soochow University        | Eastern China   | Jiangsu   | Suzhou    | Weiting Xu    |
| 127 | Wuhan Asia Heart Hospital                                   | Central China   | Hubei     | Wuhan     | Xi Su         |
| 128 | The First Affiliated Hospital of Soochow University         | Eastern China   | Jiangsu   | Suzhou    | Xiangjun Yang |
| 129 | Affiliated Hospital of Yan'an University                    | Northwest China | Shaanxi   | Yan'an    | Xiaochuan Ma  |
| 130 | The First People's Hospital of Jining                       | Eastern China   | Shandong  | Jining    | Xiaofei Sun   |
| 131 | The Central Hospital of Taiyuan                             | Northern China  | Shanxi    | Taiyuan   | Xiaoping Chen |

|     |                                                            |                 |           |           |                |
|-----|------------------------------------------------------------|-----------------|-----------|-----------|----------------|
| 132 | West China Hospital of Sichuan University                  | Northwest China | Sichuan   | Chengdu   | Xiaoping Chen  |
| 133 | The Third Affiliated Hospital of Guangzhou Medical College | Southern China  | Guangdong | Guangzhou | Ximing Chen    |
| 134 | The First Affiliated Hospital of Wannan Medical College    | Eastern China   | Anhui     | Wuhu      | Xingsheng Tang |
| 135 | Tangdu Hospital of The Fourth Military Medical University  | Northwest China | Shaanxi   | Xi'an     | Xue Li         |
| 136 | Shanghai East Hospital Affiliated to Tongji University     | Eastern China   | Shanghai  | Shanghai  | Xuebo Liu      |
| 137 | Xiamen Cardiovascular Disease Hospital                     | Eastern China   | Fujian    | Xiamen    | Yan Wang       |
| 138 | Zhongnan hospital of Wuhan University                      | Central China   | Hubei     | Wuhan     | Yanggan Wang   |
| 139 | Fujian Provincial Hospital                                 | Eastern China   | Fujian    | Fuzhou    | Yansong Guo    |
| 140 | The First Affiliated hospital of Dalian Medical University | Northeast China | Liaoning  | Dalian    | Yanzong Yang   |
| 141 | The First People's Hospital of Changde                     | Central China   | Hunan     | Changde   | Yi Huang       |
| 142 | The First Affiliated Hospital of China Medical University  | Northeast China | Liaoning  | Shenyang  | Yingxian Sun   |
| 143 | The Fourth Affiliated Hospital of China Medical University | Northeast China | Liaoning  | Shenyang  | Yuanzhe Jin    |
| 144 | Cangzhou Central Hospital                                  | Northern China  | Hebei     | Cangzhou  | Zesheng Xu     |
| 145 | The Central Hospital of Shaoyang                           | Central China   | Hunan     | Shaoyang  | Zewei Ouyang   |

|     |                                                     |                 |              |           |               |
|-----|-----------------------------------------------------|-----------------|--------------|-----------|---------------|
| 146 | The People's Hospital of Liaoning Province          | Northeast China | Liaoning     | Shenyang  | Zhanquan Li   |
| 147 | The First Affiliated Hospital of Jiamusi University | Northeast China | Heilongjiang | Jiamusi   | Zhaofa He     |
| 148 | Tangshan Gongren Hospital                           | Northern China  | Hebei        | Tangshan  | Zheng Ji      |
| 149 | Huaibei Miners General Hospital                     | Eastern China   | Anhui        | Huaibei   | Zhenqi Su     |
| 150 | Linyi People's Hospital                             | Eastern China   | Shandong     | Linyi     | Zhihong Ou    |
| 151 | Chongqing Hechuan District People's Hospital        | Southwest China | Chongqing    | Chongqing | Xin Tang      |
| 152 | Yuzhou City Central Hospital                        | Central China   | Henan        | Xuchang   | Qinfeng Su    |
| 153 | Jianshui County People's Hospital                   | Southwest China | Yunnan       | Honghe    | Weiqing Fan   |
| 154 | Dunhua City Hospital                                | Northeast China | Jilin        | Dunhua    | Fanju Meng    |
| 155 | Shenyang City Electricity Central Hospital          | Northeast China | Liaoning     | Shenyang  | Jing Xu       |
| 156 | Shanghai Jingan District Shibe Hospital             | Eastern China   | Shanghai     | Shanghai  | Bin Wang      |
| 157 | Beijing Fangshan District First Hospital            | Northern China  | Beijing      | Beijing   | Xuemei Peng   |
| 158 | Hebei Daming County People's Hospital               | Northern China  | Hebei        | Handan    | Haiping Guo   |
| 159 | Jiangsu Binhai County People's Hospital             | Eastern China   | Jiangsu      | Yancheng  | Yonglin Zhang |

|     |                                                               |                 |                |           |               |
|-----|---------------------------------------------------------------|-----------------|----------------|-----------|---------------|
| 160 | The First People's Hospital of Longquanyi District            | Southwest China | Sichuan        | Chengdu   | Wei Tuo       |
| 161 | Guangxi Hengxian County People's Hospital                     | Southern China  | Guangxi        | Nanning   | Xianan Zhang  |
| 162 | Hunan Changsha County First People's Hospital                 | Central China   | Hunan          | Changsha  | Siding Wang   |
| 163 | People's Hospital of Wugang                                   | Central China   | Hunan          | Shaoyang  | JiaoMei Yang  |
| 164 | Longhui County People's Hospital                              | Central China   | Hunan          | Shaoyang  | Xiaojun Wang  |
| 165 | Heilongjiang Fujin City Central Hospital                      | Northeast China | Heilongjiang   | Jiamusi   | Jiyan Yin     |
| 166 | Dalian Fourth People's Hospital                               | Northeast China | Liaoning       | Dalian    | Huifang Zhang |
| 167 | General Hospital of Guangzhou Military Command                | Southern China  | Guangdong      | Guangzhou | Yanlie Zheng  |
| 168 | The First People's Hospital of Horqin District, Tongliao City | Northern China  | Inner Mongolia | Tongliao  | Junping Fang  |
| 169 | Guiyang Sixth People's Hospital                               | Southwest China | Guizhou        | Guiyang   | Kalan Luo     |
| 170 | Geological Mining Hospital of Hunan Province                  | Central China   | Hunan          | Changsha  | Naiyi Liang   |
| 171 | Zhangzhou Municipal Hospital of Fujian Province               | Eastern China   | Fujian         | Zhangzhou | Changyong Liu |
| 172 | Jining City Yanzhou District People's Hospital                | Eastern China   | Shandong       | Jining    | Jian Yang     |
| 173 | The People's Hospital Feixian                                 | Eastern China   | Shandong       | Linyi     | Honghua Deng  |

|     |                                                              |                 |                |            |               |
|-----|--------------------------------------------------------------|-----------------|----------------|------------|---------------|
| 174 | Tangshan City Fengrun District People's Hospital             | Northern China  | Hebei          | Tangshan   | Lin Wang      |
| 175 | Qian'an People's Hospital                                    | Northern China  | Hebei          | Tangshan   | Yuheng Yang   |
| 176 | Yuzhong County People's Hospital                             | Northwest China | Gansu          | Lanzhou    | Xiaowei Peng  |
| 177 | Baiyin Cite Center Hospital                                  | Northwest China | Gansu          | Baiyin     | Fang Zhao     |
| 178 | Mingguang People's Hospital                                  | Eastern China   | Anhui          | Chuzhou    | Yong Li       |
| 179 | Xihua County People's Hospital                               | Central China   | Henan          | Zhoukou    | Chuntong Wang |
| 180 | Zhalantun People's Hospital                                  | Northern China  | Inner Mongolia | Hulunbeier | Yuhua Zhu     |
| 181 | Fengrun District Second People's Hospital                    | Northern China  | Hebei          | Tangshan   | Jingshan Zhao |
| 182 | Zhangping City Hospital                                      | Eastern China   | Fujian         | Zhangpin   | Jinxing Yi    |
| 183 | Fuqing Cite Hospital                                         | Eastern China   | Fujian         | Fuqing     | Ping Chen     |
| 184 | The Eight Affiliated Hospital, Sun Yat-sen University        | Southern China  | Guangdong      | Guangzhou  | Nan Jia       |
| 185 | The Second Affiliated Hospital of Qiqihar Medical University | Northeast China | Heilongjiang   | Qiqihar    | Yanli Wang    |
| 186 | Wuhan University of Science and Technology Hospital          | Central China   | Hubei          | Wuhan      | Jing Hu       |
| 187 | Baotou City Center Hospital                                  | Northern China  | Inner Mongolia | Baotou     | Ruiping Zhao  |



|     |                                                    |                 |              |           |                  |
|-----|----------------------------------------------------|-----------------|--------------|-----------|------------------|
| 188 | Shanghai Jiading District Center Hospital          | Eastern China   | Shanghai     | Shanghai  | Xia Chen         |
| 189 | Datong City Second People's Hospital               | Northern China  | Shanxi       | Datong    | Xiaoqin Zhang    |
| 190 | Binyang People's Hospital                          | Southern China  | Guangxi      | Binyang   | Fudong Gan       |
| 191 | Deqing People's Hospital                           | Eastern China   | Zhejiang     | Deqing    | Fangfang Huang   |
| 192 | Xinmi people's hospital                            | Central China   | Henan        | Xinmi     | Xiaolei Li       |
| 193 | Dongguan Changping hospital                        | Southern China  | Guangdong    | Dongguan  | Haiyun Lin       |
| 194 | Gongyi people's hospital                           | Central China   | Henan        | Gongyi    | Tianmin Du       |
| 195 | Ye County people's hospital                        | Central China   | Henan        | Yexian    | Jie Yang         |
| 196 | The second people's hospital of Mengcheng          | Eastern China   | Anhui        | Mengcheng | Pengfei Zhang    |
| 197 | Nanpi People's Hospital                            | Northern China  | Hebei        | Nanpi     | Hui Dong         |
| 198 | Shimen People's Hospital                           | Central China   | Hunan        | Shimeng   | Chuanliang Liang |
| 199 | Tieli People's Hospital                            | Northeast China | Heilongjiang | Tieli     | Yanbo Niu        |
| 200 | Sihui People's Hospital                            | Southern China  | Guangdong    | Sihui     | Yuehua Huang     |
| 201 | Chest Hospital of Xinjiang Uygur Autonomous Region | Northwest China | Xinjiang     | Urumchi   | Dongsheng Chai   |

|     |                                                    |                 |              |           |                 |
|-----|----------------------------------------------------|-----------------|--------------|-----------|-----------------|
| 202 | Beian First People's Hospital                      | Northeast China | Heilongjiang | Bei'an    | Dongyan Li      |
| 203 | Zunhua People's Hospital                           | Northern China  | Hebei        | Zunhua    | Xiaoli Yang     |
| 204 | Lujiang People's Hospital                          | Eastern China   | Anhui        | Lujiang   | Qichun Wang     |
| 205 | Qinyang People's Hospital                          | Central China   | Henan        | Qinyang   | Xiaowen Ma      |
| 206 | Longmen People's Hospital                          | Southern China  | Guangdong    | Longmen   | Yingchao Luo    |
| 207 | Quyang Renji Hospital                              | Northern China  | Hebei        | Quyang    | Congliang Zhang |
| 208 | Nenjiang People's Hospital                         | Northeast China | Heilongjiang | Nenjiang  | Shuhua Zhang    |
| 209 | Longjiang First People's Hospital                  | Northeast China | Heilongjiang | Longjiang | Yuhuan Shi      |
| 210 | Li County Hospital of Traditional Chinese Medicine | Central China   | Hunan        | Changde   | Songbai Li      |
| 211 | Luan County People's Hospital                      | Northern China  | Hebei        | Luanxian  | Guo Li          |
| 212 | Yulong Hospital                                    | Southwest China | Yunnan       | Yulong    | Zeyuan He       |
| 213 | Huining People's Hospital                          | Northwest China | Gansu        | Huining   | Jiabin Xi       |
| 214 | Yuncheng Hospital                                  | Eastern China   | Shandong     | Yuncheng  | Jinglan Diao    |
| 215 | Hepu People's Hospital                             | Southern China  | Guangxi      | Hepu      | Meisheng Lai    |

|     |                                                                   |                 |              |           |                |
|-----|-------------------------------------------------------------------|-----------------|--------------|-----------|----------------|
| 216 | Duzishan Petrochemical Hospital                                   | Northwest China | Xinjiang     | Dushanzi  | Shuqiu Qu      |
| 217 | Guiding People's Hospital                                         | Southwest China | Guizhou      | Guiding   | Guoduo Chen    |
| 218 | People's Hospital of Rongchang District                           | Southwest China | Chongqing    | Chongqing | Jie Chen       |
| 219 | Ningbo First Hospital                                             | Eastern China   | Zhejiang     | Ningbo    | Huimin Chu     |
| 220 | Ledong Second People's Hospital                                   | Southern China  | Hainan       | Ledong    | Xiufeng Chen   |
| 221 | Guang'an People's Hospital                                        | Southwest China | Sichuan      | Guang'an  | Tian Tuo       |
| 222 | Linfen People's Hospital                                          | Northern China  | Shanxi       | Linfen    | Junping Deng   |
| 223 | People's Hospital of Bozhou District                              | Southwest China | Guizhou      | Zunyi     | Shengyong Chen |
| 224 | Dianjiang People's Hospital                                       | Southwest China | Chongqing    | Dianjiang | Yang Yu        |
| 225 | First Affiliated Hospital of Harbin Medical University.           | Northeast China | Heilongjiang | Harbin    | Yue Li         |
| 226 | Yiliang Hospital                                                  | Southwest China | Yunnan       | Yiliang   | Liqiong Yang   |
| 227 | Haidong Ping'an District Hospital of Traditional Chinese Medicine | Northwest China | Qinghai      | Haidong   | Guoqin Xin     |
| 228 | Ningjin People's Hospital                                         | Eastern China   | Shandong     | Ningjin   | Tao Zhang      |
| 229 | Yutian Hospital                                                   | Northern China  | Hebei        | Yutian    | Xiaoyun Feng   |

|     |                                                                       |                 |          |          |                |
|-----|-----------------------------------------------------------------------|-----------------|----------|----------|----------------|
| 230 | Yanting People's Hospital                                             | Southwest China | Sichuan  | Yanting  | Mingcheng Bai  |
| 231 | The Fourth Affiliated Hospital Zhejiang University School of Medicine | Eastern China   | Zhejiang | Yiwu     | Shudong Xia    |
| 232 | Wuxi Xishan People's Hospital                                         | Eastern China   | Jiangsu  | Wuxi     | Xudong Li      |
| 233 | Dongfeng Hospital                                                     | Northeast China | Jilin    | Dongfeng | Wei Liu        |
| 234 | Zhijin People's Hospital                                              | Southwest China | Guizhou  | Zhijin   | Zhongshan Wang |
| 235 | Huaiyang People's Hospital                                            | Central China   | Henan    | Huaiyang | Li Wei         |
| 236 | Suizhou Central Hospital                                              | Central China   | Hubei    | Suizhou  | Fengwei Li     |
| 237 | Tonglu First People's Hospital                                        | Eastern China   | Zhejiang | Tonglu   | Xiaolan Li     |
| 238 | Xiantao First People's Hospital                                       | Central China   | Hubei    | Xiantao  | Dongmei Zhu    |
| 239 | Honghu People's Hospital                                              | Central China   | Hubei    | Honghu   | Hong Liu       |
| 240 | Xinjin County Hospital of Traditional Chinese Medicine                | Northwest China | Sichuan  | Xinjin   | Yingbi Su      |

CCC-ACS: The Improving Care for Cardiovascular Disease in China-Acute Coronary Syndrome.
